# Supplementary material for: Comparison between Fourth-Generation FloTrac/Vigileo System and Continuous Thermodilution Technique for Cardiac Output Estimation after Time Adjustment during Off-Pump Coronary Artery Bypass Graft Surgery: A Retrospective Cohort Study
Source: MDPI journal article supplement (doi:10.3390/jcm11206093), 2022-10-16

## Supplementary File S1. The results of the sensitivity analysis

### 1. Results from dataset with *six-minute time adjustment*

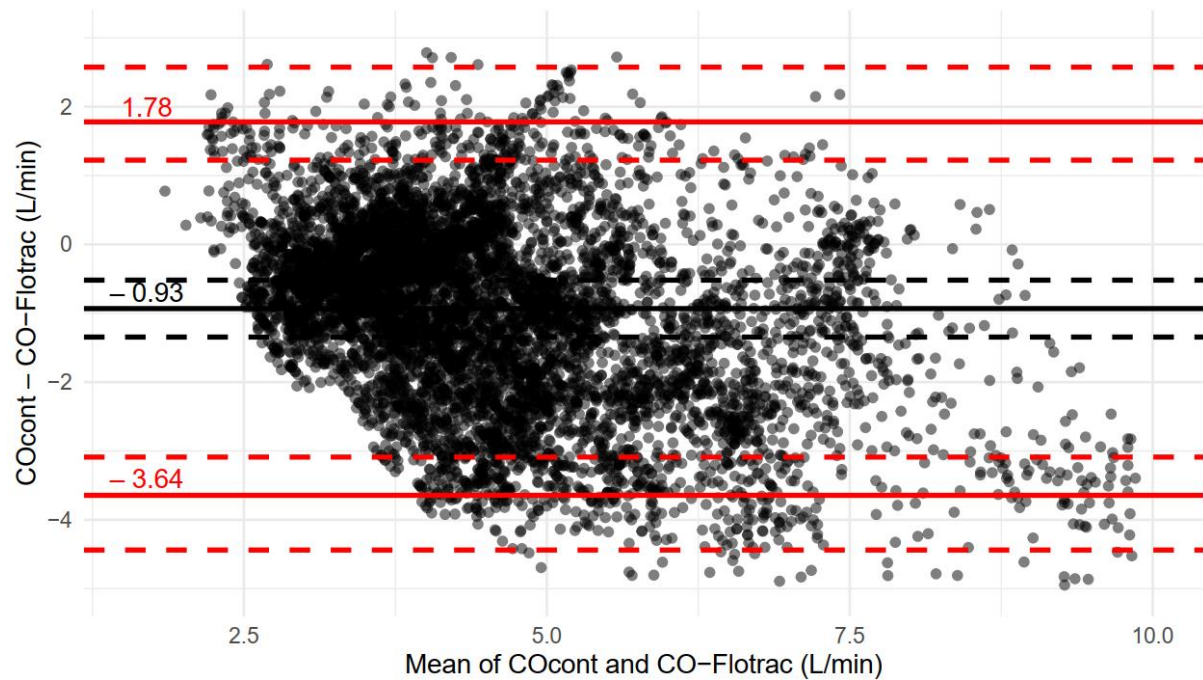

The result of Bland-Altman analysis is shown in the figure above. The mean bias was  $-0.93$  (95% CI,  $-1.35$  to  $-0.52$ ) L/min and the limits of agreements were  $-3.64$  (95% CI,  $-4.44$  to  $-3.09$ ) L/min and  $1.78$  (95% CI,  $1.22$  to  $2.57$ ) L/min. Percentage error was 66.4% (95% CI, 52.8 to 85.8%).

Four-quadrant plots using three- to 20-minutes interval change of CO<sub>cont</sub> and CO-FloTrac are shown in the figure below. Depending on the time scale and the size of the exclusion zone, concordance rates were ranged from 58.5 to 72.8%.

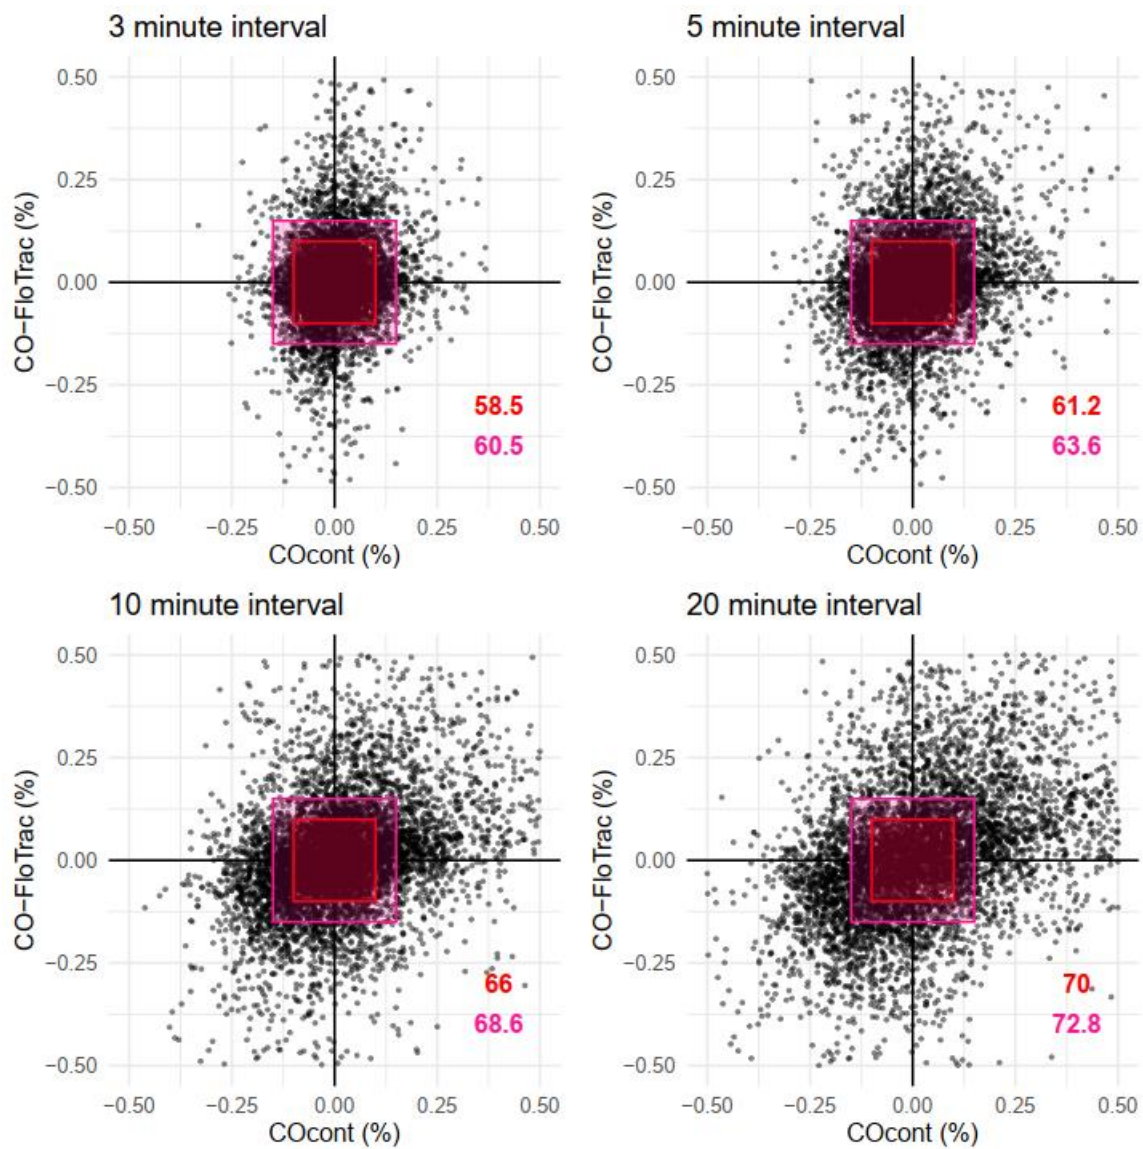

## 2. Results from dataset *without time adjustment*

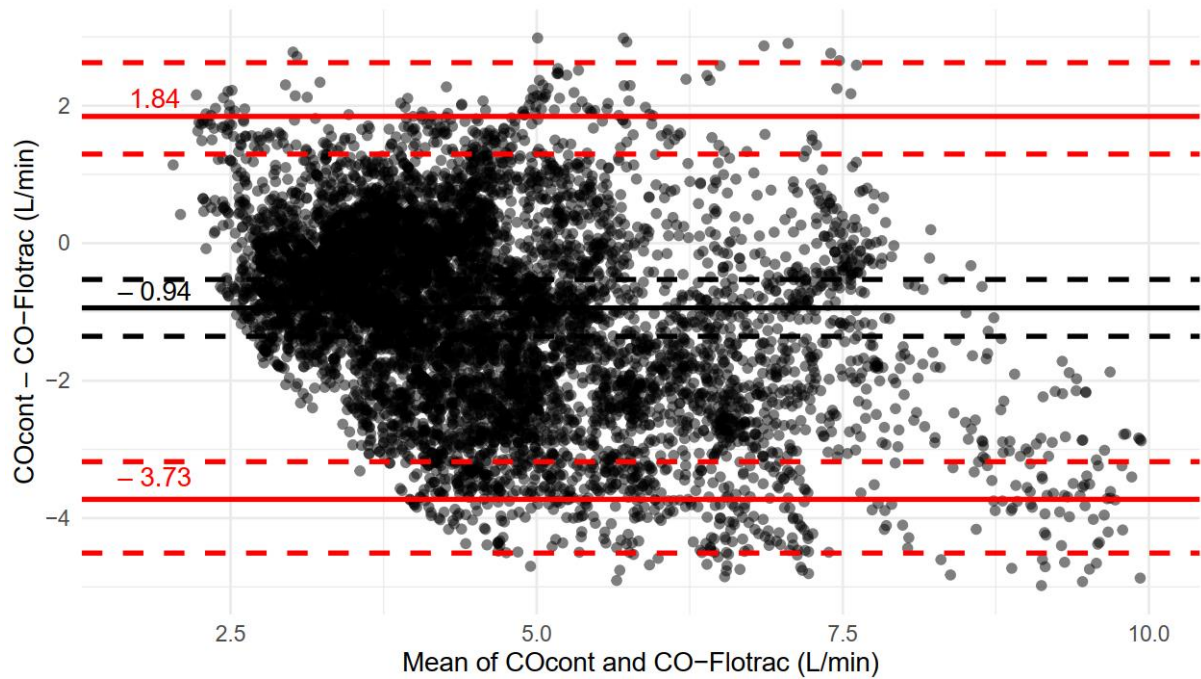

The result of Bland-Altman analysis is shown in the figure above. The mean bias was  $-0.94$  (95% CI,  $-1.35$  to  $-0.53$ ) L/min and the limits of agreements were  $-3.73$  (95% CI,  $-4.51$  to  $-3.18$ ) L/min and  $1.84$  (95% CI,  $1.30$  to  $2.63$ ) L/min. Percentage error was 68.2% (95% CI, 54.8 to 87.3%).

Four-quadrant plots using three- to 20-minutes interval change of CO<sub>cont</sub> and CO-FloTrac are shown in the figure below. Depending on the time scale and the size of the exclusion zone, concordance rates were ranged from 48.2 to 66.1%.

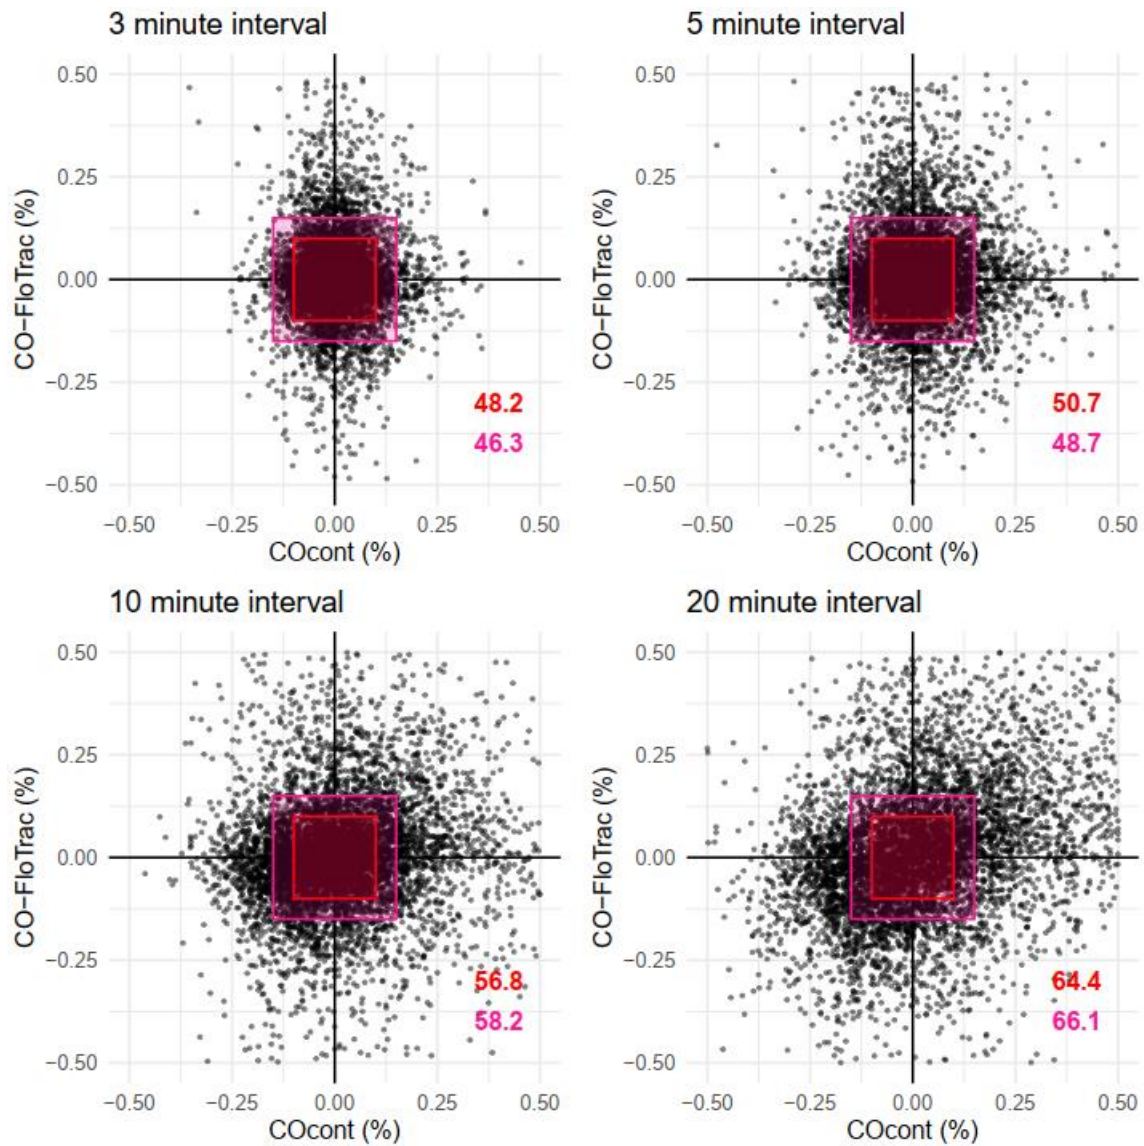

Supplement: s1 [file s1]
